# Supplementary material
Source: PubMed Central journal article supplement (PMC7034080)
Supplement: cn9b00682_si_001.pdf [file cn9b00682_si_001.pdf]

## Supporting Information

Supplemental table 1: EMM  $\pm$  SE values of whole-blood, plasma, metabolite-corrected plasma and percentage of parent fraction at different PET scans.

| Scan                                                    | EMM $\pm$ SE     | Comparison                | p values |
|---------------------------------------------------------|------------------|---------------------------|----------|
| <b>Whole-blood TAC</b>                                  |                  |                           |          |
| Anesthesia-exposed                                      | 1.12 $\pm$ 0.04  | Anesthesia-exposed-Test   | 0.018*   |
| Test                                                    | 0.96 $\pm$ 0.05  | Test-Retest               | 0.001*   |
| Retest                                                  | 1.12 $\pm$ 0.03  | Retest-Anesthesia-exposed | 0.886    |
| <b>Plasma TAC</b>                                       |                  |                           |          |
| Anesthesia-exposed                                      | 1.25 $\pm$ 0.05  | Anesthesia-exposed-Test   | 0.009*   |
| Test                                                    | 1.02 $\pm$ 0.07  | Test-Retest               | 0.002*   |
| Retest                                                  | 1.2 $\pm$ 0.07   | Retest-Anesthesia-exposed | 0.521    |
| <b>Metabolite-corrected plasma TAC</b>                  |                  |                           |          |
| Anesthesia-exposed                                      | 1.2 $\pm$ 0.05   | Anesthesia-exposed-Test   | 0.003*   |
| Test                                                    | 0.96 $\pm$ 0.07  | Test-Retest               | > 0.001* |
| Retest                                                  | 1.14 $\pm$ 0.06  | Retest-Anesthesia-exposed | 0.482    |
| <b>% Parent Fraction throughout scan-time</b>           |                  |                           |          |
| Anesthesia-exposed                                      | 80.39 $\pm$ 0.7  | Anesthesia-exposed-Test   | > 0.001* |
| Test                                                    | 75.53 $\pm$ 0.5  | Test-Retest               | 0.005*   |
| Retest                                                  | 78.93 $\pm$ 1.07 | Retest-Anesthesia-exposed | 0.263    |
| * Significant differences in the SUV-TAC between scans. |                  |                           |          |

Supplemental table 2: Mean  $\pm$  SE of AIC, SE%V<sub>T</sub>, SE%K<sub>1</sub> and SE%k<sub>2</sub> of all the brain region in the three different PET scan using 60-min acquisition time.

| <b>"Anesthesia-Exposed" PET</b> |                     |                               |                               |                               |                      |                               |                               |                               |
|---------------------------------|---------------------|-------------------------------|-------------------------------|-------------------------------|----------------------|-------------------------------|-------------------------------|-------------------------------|
| Regions                         | 1TCM                |                               |                               |                               | 2TCM                 |                               |                               |                               |
|                                 | AIC $\pm$<br>SD     | SE%V <sub>T</sub> $\pm$<br>SD | SE%K <sub>1</sub> $\pm$<br>SD | SE%K <sub>2</sub> $\pm$<br>SD | AIC $\pm$<br>SD      | SE%V <sub>T</sub> $\pm$<br>SD | SE%K <sub>1</sub> $\pm$<br>SD | SE%K <sub>2</sub> $\pm$<br>SD |
| <b>Amygdala</b>                 | 54.77 $\pm$<br>6.33 | 9.75 $\pm$<br>1.12            | 5.21 $\pm$<br>0.86            | 12.55 $\pm$<br>1.57           | 32.78 $\pm$<br>8.53  | 9.23 $\pm$<br>2.66            | 18.71 $\pm$<br>20.65          | 49.06 $\pm$<br>28.06          |
| <b>Cerebellum</b>               | 51.92 $\pm$<br>6.13 | 8.51 $\pm$<br>1.14            | 4.73 $\pm$<br>0.7             | 10.97 $\pm$<br>1.46           | 9.33 $\pm$<br>12.34  | 3.78 $\pm$<br>0.78            | 8.07 $\pm$<br>3.01            | 25.53 $\pm$<br>7.45           |
| <b>Corpus Callosum</b>          | 37.4 $\pm$<br>7.24  | 6.71 $\pm$<br>0.94            | 3.44 $\pm$<br>0.6             | 8.6 $\pm$<br>1.21             | 13.02 $\pm$<br>13.52 | 5.02 $\pm$<br>1.36            | 7.63 $\pm$<br>2.45            | 39.84 $\pm$<br>13.74          |
| <b>Medial Geniculate</b>        | 80.5 $\pm$<br>11.5  | 17.69 $\pm$<br>4.73           | 9.92 $\pm$<br>2.9             | 22.87 $\pm$<br>6.3            | 75.27 $\pm$<br>13.61 | 21.23 $\pm$<br>11.05          | 76.93 $\pm$<br>52.1           | 159.41 $\pm$<br>75.91         |
| <b>Mesencephalic Region</b>     | 50.08 $\pm$<br>6.56 | 7.94 $\pm$<br>1.39            | 4.49 $\pm$<br>0.75            | 10.24 $\pm$<br>1.75           | 26.52 $\pm$<br>8.66  | 5.49 $\pm$<br>1.25            | 12.96 $\pm$<br>7.3            | 43.69 $\pm$<br>16.31          |
| <b>Septum</b>                   | 63 $\pm$<br>6.3     | 11.33 $\pm$<br>1.82           | 6.24 $\pm$<br>1.09            | 14.61 $\pm$<br>2.4            | 54.28 $\pm$<br>8.57  | 18.43 $\pm$<br>12.7           | 14.39 $\pm$<br>5.17           | 61.33 $\pm$<br>21.39          |

|                            |                |                |               |                |                 |               |                 |                 |
|----------------------------|----------------|----------------|---------------|----------------|-----------------|---------------|-----------------|-----------------|
| <b>Superior Colliculus</b> | 63.36±<br>5.32 | 10.88±<br>1.71 | 6.23±<br>0.91 | 14.06±<br>2.13 | 37.68±<br>9.49  | 6.89±<br>1.26 | 24.94±<br>18.62 | 54.29±<br>25.15 |
| <b>Striatum</b>            | 43.06±<br>9.11 | 7.32±<br>1.54  | 3.95±<br>0.83 | 9.42±<br>1.94  | 19.84±<br>20.8  | 6.61±<br>4.68 | 7.32±<br>2.58   | 35.74±<br>15.43 |
| <b>Cortex</b>              | 30.48±<br>5.98 | 6.15±<br>0.7   | 2.92±<br>0.45 | 7.82±<br>0.92  | -5.64±<br>9.32  | 4.15±<br>1.45 | 5.02±<br>2.94   | 25.59±<br>5.36  |
| <b>Hippocampus</b>         | 48.04±<br>7.82 | 8.3±<br>1.28   | 4.45±<br>0.92 | 10.69±<br>1.76 | 8.36±<br>13.22  | 4.67±<br>1.42 | 6.9±<br>3.42    | 24.84±<br>8.26  |
| <b>Hypothalamus</b>        | 53.63±<br>9.43 | 9.13±<br>1.53  | 5.04±<br>1.18 | 11.79±<br>2.14 | 31.4±<br>8.06   | 7.3±<br>1.59  | 19.66±<br>16.3  | 52.24±<br>24.65 |
| <b>MidBrain</b>            | 55.18±<br>5.25 | 8.97±<br>1.1   | 5.07±<br>0.6  | 11.58±<br>1.36 | 30.13±<br>11.89 | 6.49±<br>1.73 | 10.98±<br>4.94  | 40.97±<br>17.76 |
| <b>Brainstem</b>           | 47.49±<br>2.62 | 7.23±<br>0.35  | 4.13±<br>0.32 | 9.35±<br>0.46  | 18.49±<br>21.16 | 5.32±<br>3.9  | 7.15±<br>2.66   | 32.41±<br>18.77 |
| <b>Thalamus</b>            | 56.77±<br>8.31 | 9.48±<br>2.43  | 5.41±<br>1.4  | 12.25±<br>3.14 | 26.47±<br>8.26  | 6.01±<br>1.7  | 11.21±<br>7.07  | 33.28±<br>6.81  |
| <b>Basal Ganglia</b>       | 47.32±<br>5.34 | 7.82±<br>1.27  | 4.31±<br>0.63 | 10.08±<br>1.58 | 28.84±<br>8.48  | 6.98±<br>1.53 | 13.71±<br>10.99 | 47.99±<br>20.63 |
| <b>Whole Brain</b>         | 41.75±<br>4.86 | 7.1±<br>0.75   | 3.75±<br>0.5  | 9.12±<br>0.99  | 5.08±<br>14.09  | 3.21±<br>0.83 | 5.19±<br>2.94   | 20.54±<br>6.46  |

| "Test" PET                  |                |                           |                           |                           |                 |                           |                           |                           |
|-----------------------------|----------------|---------------------------|---------------------------|---------------------------|-----------------|---------------------------|---------------------------|---------------------------|
| Regions                     | 1-TCM          |                           |                           |                           | 2-TCM           |                           |                           |                           |
|                             | AIC±<br>SD     | SE%V <sub>T</sub> ±<br>SD | SE%K <sub>1</sub> ±<br>SD | SE%K <sub>2</sub> ±<br>SD | AIC±<br>SD      | SE%V <sub>T</sub> ±S<br>D | SE%K <sub>1</sub> ±<br>SD | SE%K <sub>2</sub> ±<br>SD |
| <b>Amygdala</b>             | 60.23±<br>3.67 | 12.63±<br>3.67            | 5.93±<br>1.44             | 15.82±<br>4.43            | 36.09±<br>10.06 | 11.08±<br>4.67            | 15.57±<br>5.53            | 46.2±<br>9.77             |
| <b>Cerebellum</b>           | 50.75±<br>1.49 | 8.73±<br>1.49             | 4.47±<br>0.63             | 11.03±<br>1.8             | -0.32±<br>11.76 | 3.62±<br>1.83             | 5.98±<br>2.15             | 19.69±<br>4.2             |
| <b>Corpus Callosum</b>      | 40.07±<br>1.23 | 7.81±<br>1.23             | 3.56±<br>0.51             | 9.77±<br>1.48             | 17.17±<br>8.1   | 7.9±<br>2.93              | 7.21±<br>1.81             | 37.16±<br>9.28            |
| <b>Medial Geniculate</b>    | 68.95±<br>4.11 | 13.9±<br>4.11             | 7.18±<br>2.15             | 17.59±<br>5.22            | 64.02±<br>13.37 | 259709.42±<br>580689.72   | 44.79±<br>45.17           | 98.85±<br>56.68           |
| <b>Mesencephalic Region</b> | 57.33±<br>1.85 | 9.83±<br>1.85             | 5.21±<br>0.84             | 12.46±<br>2.25            | 28.07±<br>9.54  | 6.16±<br>1.86             | 11.76±<br>1.53            | 37.15±<br>7.58            |
| <b>Septum</b>               | 71.02±<br>2.16 | 14.69±<br>2.16            | 7.41±<br>1.04             | 18.55±<br>2.68            | 61.74±<br>8.43  | 38±<br>54.88              | 64.25±<br>41.08           | 108.98±<br>55.66          |
| <b>Superior Colliculus</b>  | 60.34±<br>3.55 | 10.94±<br>3.55            | 5.83±<br>1.84             | 13.86±<br>4.43            | 35.32±<br>9.63  | 7.15±<br>1.73             | 12.79±<br>8.15            | 45.39±<br>11.71           |
| <b>Striatum</b>             | 44.38±<br>2.35 | 8.42±<br>2.35             | 4.02±<br>0.99             | 10.57±<br>2.87            | 19.87±<br>8.54  | 6.56±<br>2.71             | 22.86±<br>18.25           | 53.27±<br>24.01           |
| <b>Cortex</b>               | 29.88±<br>1.9  | 7.11±<br>1.9              | 2.88±<br>0.68             | 8.78±<br>2.28             | -10.02±<br>9.84 | 3.75±<br>1.28             | 10.94±<br>10.96           | 33.01±<br>17.34           |
| <b>Hippocampus</b>          | 49.2±<br>1.7   | 9.14±<br>1.7              | 4.41±<br>0.69             | 11.49±<br>2.1             | 17.68±<br>9.55  | 6.2±<br>2                 | 8.77±<br>1.88             | 32.98±<br>10.65           |
| <b>Hypothalamus</b>         | 52.53±<br>1.23 | 9.45±<br>1.23             | 4.69±<br>0.65             | 11.91±<br>1.54            | 31.35±<br>8.39  | 7.89±<br>1.94             | 18.81±<br>16.3            | 50.99±<br>27.04           |
| <b>MidBrain</b>             | 55.55±<br>2.47 | 9.73±<br>2.47             | 5.07±<br>1.18             | 12.31±<br>3.05            | 28.99±<br>10.47 | 6.91±<br>1.9              | 11.92±<br>8.04            | 38.05±<br>8.45            |
| <b>Brainstem</b>            | 49.85±<br>1.77 | 8.21±<br>1.77             | 4.32±<br>0.81             | 10.39±<br>2.17            | 10.05±<br>6.84  | 3.86±<br>0.87             | 6.74±<br>2.64             | 25.72±<br>3.78            |
| <b>Thalamus</b>             | 52.66±<br>2.09 | 9.02±<br>2.09             | 4.74±<br>0.93             | 11.41±<br>2.55            | 20.59±<br>10.79 | 5.39±<br>1.43             | 7.65±<br>12.09            | 35.43±<br>15.71           |
| <b>Basal Ganglia</b>        | 52.09±<br>0.9  | 9.23±<br>0.9              | 4.67±<br>0.42             | 11.66±<br>1.08            | 28.1±<br>4.31   | 6.84±<br>1.54             | 27.25±<br>23.58           | 56.69±<br>30.05           |
| <b>Whole Brain</b>          | 42.01±<br>1.66 | 7.86±<br>1.66             | 3.72±<br>0.66             | 9.86±<br>2                | -9.91±<br>10.73 | 3.11±<br>1.09             | 5.32±<br>2.22             | 19.51±<br>4.56            |

| "Retest" PET                |                 |                           |                           |                           |                  |                                   |                           |                           |
|-----------------------------|-----------------|---------------------------|---------------------------|---------------------------|------------------|-----------------------------------|---------------------------|---------------------------|
| Regions                     | 1-TCM           |                           |                           |                           | 2-TCM            |                                   |                           |                           |
|                             | AIC±<br>SD      | SE%V <sub>1</sub> ±<br>SD | SE%K <sub>1</sub> ±<br>SD | SE%K <sub>2</sub> ±<br>SD | AIC±<br>SD       | SE%V <sub>1</sub> ±<br>SD         | SE%K <sub>1</sub> ±<br>SD | SE%K <sub>2</sub> ±<br>SD |
| <b>Amygdala</b>             | 60.81±<br>1.76  | 11.5±<br>1.03             | 5.95±<br>0.27             | 14.95±<br>1.18            | 37.6±<br>4.69    | 8.36±<br>1.41                     | 44.25±<br>30.64           | 79.07±<br>39.17           |
| <b>Cerebellum</b>           | 53.75±<br>4.94  | 8.9±<br>0.83              | 4.89±<br>0.62             | 11.34±<br>1.12            | 8.07±<br>7.56    | 3.52±<br>0.66                     | 10.45±<br>3.69            | 28.11±<br>8.89            |
| <b>Corpus Callosum</b>      | 38.65±<br>4.46  | 7±<br>0.57                | 3.49±<br>0.36             | 8.85±<br>0.71             | 11.53±<br>12.59  | 4.4±<br>0.94                      | 29.15±<br>34.15           | 71.65±<br>61.17           |
| <b>Medial Geniculate</b>    | 75.83±<br>9.72  | 15.69±<br>4.59            | 8.61±<br>2.2              | 19.53±<br>5.66            | 66.05±<br>13.63  | 29.54±31<br>.51                   | 35.44±<br>28.51           | 82.04±<br>39.21           |
| <b>Mesencephalic Region</b> | 54.39±<br>6.79  | 8.87±<br>1.27             | 4.97±<br>0.92             | 11.66±<br>1.73            | 27.79±<br>5.26   | 5.69±<br>1.44                     | 26.96±<br>21.54           | 59.82±<br>31.15           |
| <b>Septum</b>               | 63.22±<br>15.06 | 12.24±<br>3.89            | 6.58±<br>2.34             | 16.73±<br>5.02            | 51.66±<br>10.31  | 940983345.97<br>±<br>2304929016.4 | 13.38±<br>5               | 49.87±<br>10.36           |
| <b>Superior Colliculus</b>  | 63.12±<br>9.29  | 10.99±<br>2.6             | 6.24±<br>1.53             | 12.97±<br>3.33            | 32.43±<br>10.62  | 6.51±<br>1.49                     | 22.93±<br>25.17           | 44.33±<br>37.65           |
| <b>Striatum</b>             | 48.22±<br>5.22  | 8.39±<br>1.02             | 4.42±<br>0.59             | 10.41±<br>1.3             | 19.05±<br>13.37  | 5.11±<br>2.14                     | 30.52±<br>31.44           | 63.56±<br>43.69           |
| <b>Cortex</b>               | 36.31±<br>6.94  | 7.28±<br>0.9              | 3.36±<br>0.52             | 9.02±<br>1.12             | -10.41±<br>13.13 | 3.18±<br>1.26                     | 9.06±<br>8.01             | 29.38±<br>15.96           |
| <b>Hippocampus</b>          | 48.46±<br>6.06  | 8.51±<br>1.15             | 4.43±<br>0.63             | 10.36±<br>1.45            | 11.89±<br>9.99   | 4.58±<br>1.03                     | 12.83±<br>11.35           | 35.92±<br>20.17           |
| <b>Hypothalamus</b>         | 59.39±<br>5.26  | 10.63±<br>1.61            | 5.68±<br>0.68             | 13.83±<br>1.94            | 33.07±<br>8.09   | 6.76±<br>1.61                     | 37.2±<br>33.52            | 69.21±<br>44.16           |
| <b>MidBrain</b>             | 58.33±<br>6.14  | 9.89±<br>1.63             | 5.49±<br>0.89             | 11.96±<br>2.04            | 31.28±<br>9.46   | 5.92±<br>1.4                      | 31.3±<br>26.4             | 63.53±<br>32.77           |
| <b>Brainstem</b>            | 53.87±<br>5.04  | 8.56±<br>0.91             | 4.83±<br>0.63             | 10.85±<br>1.23            | 15.88±<br>8.29   | 4.07±<br>1                        | 15.49±<br>16.37           | 37.24±<br>21.89           |
| <b>Thalamus</b>             | 53.88±<br>5.98  | 8.77±<br>1.32             | 4.94±<br>0.77             | 10.67±<br>1.67            | 30.06±<br>25.36  | 7.5±<br>7.02                      | 14.02±<br>6.89            | 48.9±<br>25.92            |
| <b>Basal Ganglia</b>        | 55.6±<br>5.3    | 9.52±<br>1.38             | 5.22±<br>0.68             | 11.69±<br>1.69            | 28.5±<br>10.47   | 6.18±<br>1.47                     | 12.56±<br>8.17            | 35.8±<br>25.62            |
| <b>Whole Brain</b>          | 45.9±<br>4.24   | 7.95±<br>0.55             | 4.12±<br>0.44             | 10±<br>0.74               | -3.24±<br>9.25   | 3.04±<br>0.7                      | 8.02±<br>3.82             | 24.67±<br>9.03            |
